# 1 **Determinants of HIV infection among pregnant women in** 2 **Cameroon: A contribution toward the elimination of** 3 **vertical transmission in low- and middle-income countries**

4 Justin Ndié<sup>1\*</sup>, Jean Pierre Yves Awono Noah<sup>1</sup>, Francis Ateba Ndongo<sup>1</sup>, Joseph Fokam<sup>3,9\*</sup>, Alice  
5 Ketchaji<sup>4</sup>, Rogacien Kana Dongmo<sup>1</sup>, Christian Noël Bayiha<sup>2</sup>, Richard Tchabda<sup>11</sup>, Tatiana  
6 Avang Nkoa Palisson<sup>1</sup>, Martial Gaël Bonyohe<sup>1</sup>, Caroline Teh Monteh<sup>1</sup>, Njamsnhi Yembe  
7 Wepnyu<sup>1</sup>, Félicité Naah Tabala<sup>1</sup>, Hernandez Lélé Siaka<sup>2</sup>, Carelle Djofang Yepndo<sup>4</sup>, Audrey  
8 Raïssa Djomo Nzaddi<sup>3</sup>, Maurice Rocher Mbella<sup>4</sup>, Marie Micheline Dongmo<sup>1</sup>, Gildas  
9 Nguemkam<sup>1</sup>, Ngo Issouck<sup>10</sup>, Nelly Monkam<sup>2</sup>, Leopoldine Madjo Oumbe<sup>4</sup>, Clifford Moluh<sup>8</sup>,  
10 Paul Tjek<sup>5</sup>, Vittorio Colizzi<sup>9</sup>, Carlo-Federico Perno<sup>9</sup>, Giulia Cappelli<sup>9</sup>, Nicaise Ndembé<sup>12</sup>,  
11 David Kob<sup>9</sup>, Gregory-Edie Halle Ekane<sup>7</sup>, Basile Keugoung<sup>8</sup>, Alexis Ndjolo<sup>9</sup>, Serge Clotaire  
12 Billong<sup>6</sup>, Céline Nkenfou<sup>9</sup>, Jérôme Ateudjieu<sup>1</sup>, Anne Cécile Zoung-Kanyi Bissek<sup>1</sup>

13 <sup>1</sup> Division of Operational Research in Health

14 <sup>2</sup> Health Projects Implementation Unit -BID

15 <sup>3</sup> Central Technical Group – NACC, Cameroon

16 <sup>4</sup> Department of Disease Control, Epidemics and Pandemics, Cameroon

17 <sup>5</sup> Family Health Department, Cameroon

18 <sup>6</sup> National Onchocerciasis Control Program, Cameroon

19 <sup>7</sup> University of Buea, Cameroon

20 <sup>8</sup> UNICEF-Cameroun

21 <sup>9</sup> CIRCB Yaounde, Cameroon

22 <sup>10</sup> Littoral Regional Public Health Delegation, Cameroon

23 <sup>11</sup> Yaounde Central Hospital, Cameroon

24 Africa Centres for Disease Control and Prevention, Addis Ababa, Ethiopia

NOTE: This preprint reports new research that has not been certified by peer review and should not be used to guide clinical practice.

25 \*Correspondence: Justin Ndié ([ndjust2002@yahoo.fr](mailto:ndjust2002@yahoo.fr)) and Joseph Fokam ([joseph.fokam@cnils.cm](mailto:joseph.fokam@cnils.cm))

## 26 Abstract

27 **Background:** The risk of HIV transmission during antenatal care (ANC) in Cameroon remains  
28 a concern. According to recent studies, the prevalence of HIV in the country is around 4.5%,  
29 which increases the likelihood of vertical transmission.

30 **Objective:** To identify the determinants of HIV infection among pregnant women attending  
31 antenatal clinics (ANC) in Cameroon and to estimate HIV seroprevalence.

32 **Methods:** A cross-sectional study was conducted among ANC attendees aged  $\geq 15$  years from  
33 September 2022 to June 2023 in 324 health facilities in 08 regions of Cameroon (Adamaoua,  
34 Yaounde, East, Far-North, Douala, North, West, South). Sociodemographic and clinical data  
35 were collected using questionnaire. HIV screening was performed according to the national  
36 algorithm. Estimates of HIV seroprevalence and identification of its determinants using  
37 multivariable logistic regression (95% CI) were performed with Excel and SPSS 22 software.

38 **Results:** Overall, 10674 pregnant women were enrolled, with median [IQR] age 25 years [21–  
39 30]; 40.0% at a secondary educational level; 44.1% married monogamously; 46.3%  
40 multiparous; 38.8% in the second quarter of pregnancy and 16.5% reporting at least one  
41 abortion. Overall HIV seroprevalence was 2.6% [95%CI: 2.33; 2.93]. Significantly higher  
42 prevalence was found with the regions of Adamaoua (aOR 3.78 [95%CI: 1.87-7.67],  $p < 0.001$ ),  
43 East (9.38 [5.6-15.67],  $p < 0.001$ ), North (3.07 [1.74-5.42],  $p < 0.001$ ), South (2.93 [1.66-5.16];  
44  $p < 0.001$ ); lack of education (2.08 [1.06-4.06],  $p = 0.032$ ), primary education (2.44 [1.32-4.50],  
45  $p = 0.004$ ) and secondary education (2.29 [1.28-4.08],  $p = 0.005$ ) were significantly associated  
46 with HIV infection, while monogamous marriage (0.33 [0.22-0.51],  $p < 0.001$ ), the absence of  
47 abortion (0.59 [0.37-0.98],  $p = 0.036$ ) and large multiparous (0.38 [0.17-0.82];  $p = 0.015$ ) were  
48 protective.

49 **Conclusion:** Despite the overall low-prevalence among pregnant women at national-level,  
50 several factors are associated with HIV in ANC, the absence or low-level of education, being

51 elderly (>30 years), singleness, history of abortion and low parity predicted the HIV status  
52 during ANC. Thus, public health interventions towards these at-risk target groups will help to  
53 reduce new infections among pregnant women, hence contributing to achieve eMTCT in  
54 Cameroon.

55 **Keywords:** HIV, pregnant women, eMTCT, seroprevalence, determinants, Cameroon

## 56 **Introduction**

57 HIV infection is still prevalent in pregnant women and remains a major public health concern  
58 across several low-and middle-income countries (LMICs). Of note, about 1.5 million pregnant  
59 women are living with HIV worldwide (1,2), sub-Saharan Africa is home to two-third of cases  
60 worldwide (3), with prevalence varying between 5% and 42% among pregnant women (4).

61 Pregnant women living with HIV are at high risk of vertical transmission to their infants during  
62 pregnancy, childbirth or breastfeeding (5). Of relevance, in the absence of any intervention,  
63 between 20% and 45% of infants could contract HIV, with an estimated risk of 5-10% during  
64 pregnancy, 0-20% during labour and delivery and 5-20% during breastfeeding (4–9).  
65 Furthermore, without treatment, half of all HIV-infected children will die before their second  
66 birthday, thereby stressing the need to consider the elimination of HIV vertical in high priority  
67 countries, including Cameroon (4).

68 Despite a 50% decline in HIV prevalence from 5.5% in 2005 (10) to 2.7% in 2018 (11) in the  
69 general population, the burdens of HIV in specific populations including pregnant women  
70 remain high in Cameroon. Although HIV prevalence among pregnant women fell from 7.6% in  
71 2009 to 4.26% in 2019 in Cameroon, some geographical regions still stand at higher risks (i.e.  
72 South with 8.46%), underscoring the need for regular surveillance to ensure evidence-based  
73 public health actions for eliminating HIV vertical transmission (12). Furthermore, HIV  
74 prevalence among pregnant women in Cameroon is similarly distributed, ranging from 5.58%

75 in urban areas to 5.87% in rural settings according to reports of the sentinel surveillance survey  
76 of 2019 (13,14).

77 Several factors contribute to the dynamics of this infection in pregnant women in these  
78 Cameroonian settings, among which being single as marital status, multiparity, age and living  
79 in specific regions were significantly associated risk of contracting HIV infection (14). Thus,  
80 controlling these drivers of HIV infection among pregnant women is an essential component in  
81 achieving the global effort in eliminating paediatric HIV by 2030. However, with population  
82 dynamics and behavioural changes overtime, it is of paramount importance to generate update  
83 evidence for strategic information toward priority interventions at the public health level.  
84 Therefore, our study objective was to update HIV epidemiology and identify determinants of  
85 infection among pregnant women attending antenatal clinics in Cameroon.

## 86 **Methods and materials**

### 87 *Ethical considerations*

88 Ethical approval was obtained from the National Ethics Committee for Human  
89 Health Research (reference number N°2022/08/1478/CE/CNERSH/SP) and an  
90 Administrative Research Authorization (reference number N° 631-26-22) was  
91 obtained. Written informed consent was obtained from study participants.  
92 Furthermore, parental or guardian consent has been obtained for each pregnant  
93 woman under the age of 21. It should be noted that the legal age of majority in  
94 Cameroon is 21.

### 95 *Study design*

96 A national cross-sectional study was carried out between September 2022 and June 2023  
97 among pregnant women receiving antenatal care (ANC) in 324 facilities in eight regions of  
98 Cameroon: Adamaoua, East, Far North, North, West, South, Yaounde and Douala. Yaounde

99 and Douala are major cities comparable to other regions of the country due to their  
100 demographic weight. The health facilities were selected on the basis of their monthly ANC  
101 weight.

## 102 ***Study population***

103 The study population consisted of pregnant women aged 15 and over, who consented to  
104 participate in the study and were receiving antenatal and maternity care. In addition, they had to  
105 be of unknown HIV status or have been declared HIV-negative for at least three months.  
106 Pregnant women receiving antiretroviral treatment and/or presenting with an acute illness likely  
107 to interfere with the study process were not included.

## 108 ***Sample size and sampling***

109 The sample size was calculated using the WHO expert formula (Adequacy of sample size in  
110 health surveys) and taking into account the HIV prevalence of pregnant women observed in  
111 previous studies at national level (13,15). Accordingly, the sample size was estimated at 10573  
112 pregnant women.

## 113 ***Data collection and HIV testing procedure***

114 Two HIV tests were used according to national guidelines (national HIV screening algorithm):  
115 Determine (Abbott Laboratories, IL, USA) and Oraquick.

116 Data collection was carried out by health workers (Nurses and Midwives) in the antenatal and  
117 maternity consultation departments of the health facilities selected for the study. They were  
118 trained for 03 days in the use of Determine and Oraquick for HIV screening and in the study  
119 methodology. Testing took place at the entry point (antenatal and maternity clinics) of the  
120 health facilities selected for the study. The number of pregnant women to be recruited at each  
121 health facility was based on the average number of antepartum consultations per month.  
122 Pregnant women were recruited by voluntary sample until the size of the workforce per site  
123 was reached. When a pregnant women arrived at the ANC or maternity ward, the site's trained

124 provider introduced himself to her, checked her eligibility, sent her the information leaflet and  
125 asked for her informed consent.

126 Once the participants had provided informed consent, pre-test counselling was conducted, after  
127 which HIV testing of pregnant women was performed in accordance with the national  
128 algorithm (Figure 1). Pregnant women who tested positive by the national HIV screening  
129 algorithm were managed by the aforementioned health facility in accordance with the  
130 guidelines for HIV management in Cameroon.

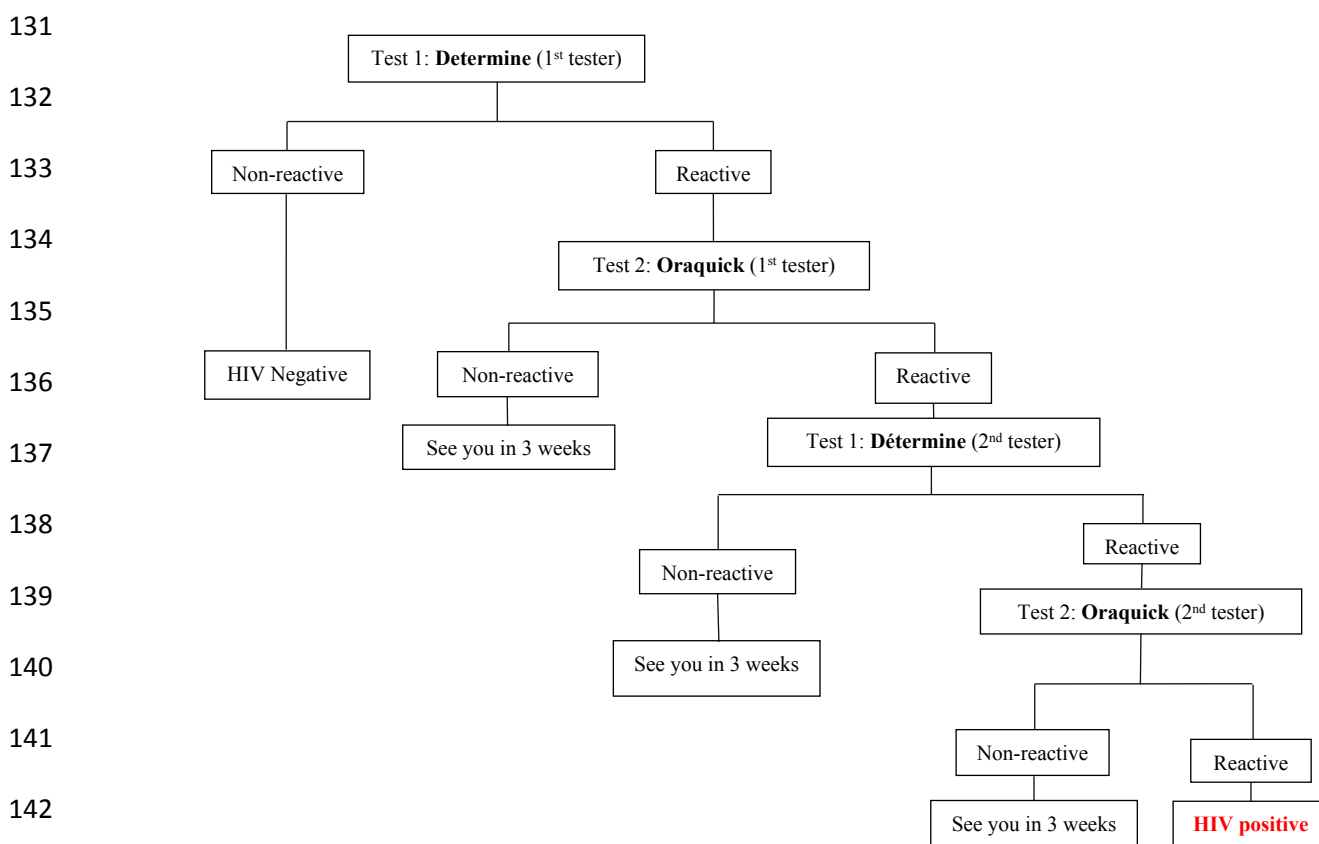

143 **Figure 1:** HIV screening algorithm used in the study

## 144 ***Data management***

145 Data were collected on a specific register developed for the purpose of the study. Collected data  
146 were then entered using CS Pro 7.7.3 and analysed using SPSS 22. Numerical variables were  
147 described using the median with the interquartile range (IQR), and categorical variables were  
148 described using proportions. Multivariate logistic regression was used to identify the  
149 determinants of HIV seroprevalence. The variables included in the multivariate regression

150 were: region, age, level of education, marital status, age of pregnancy, number of pregnancies  
151 and history of abortions. Indeterminate results interpreted by healthcare staff were excluded  
152 from the model. *HIV seroprevalence* was defined as the proportion of pregnant women who  
153 tested positive by the HIV screening algorithm.

## 154 Results

### 155 *Sociodemographic characteristics of pregnant women*

156 Of 10,673 pregnant women tested, the median age was 25 (21 - 30) and the age group most  
157 represented was 25-30 (31.3%). 44.1% were in a monogamous marriage, 46.3% of pregnant  
158 women were multiparous, 38.8% of pregnant women were in the 2nd trimester of pregnancy  
159 and 16.5% of pregnant women had declared that they had already had at least one abortion.

160 **Table I:** Sociodemographic characteristics of pregnant women

| Sociodemographic characteristics | N= 10,673          |      |
|----------------------------------|--------------------|------|
| Region                           | not                | %    |
| <i>Adamaoua</i>                  | 740                | 6.9  |
| <i>East</i>                      | 838                | 7.9  |
| <i>Far North</i>                 | 2091               | 19.6 |
| <i>North</i>                     | 2054               | 19.2 |
| <i>West</i>                      | 110                | 1.0  |
| <i>South</i>                     | 732                | 6.9  |
| <i>Yaounde</i>                   | 2173               | 20.4 |
| <i>Douala</i>                    | 1935               | 18.1 |
| <b>Median age (IQR)</b>          | 25 years (21 – 30) |      |
| <i>Under 20</i>                  | 1687               | 15.8 |
| <i>20 - 25 years old</i>         | 3121               | 29.3 |
| <i>25 - 30 years old</i>         | 3336               | 31.3 |
| <i>30 - 35 years old</i>         | 1649               | 15.5 |
| <i>Over 35 years old</i>         | 859                | 8.1  |
| <b>Educational level</b>         |                    |      |
| <i>Never schooled</i>            | 2149               | 20.6 |
| <i>Primary</i>                   | 2729               | 26.2 |
| <i>Secondary 1st cycle</i>       | 2644               | 25.3 |
| <i>Secondary 2nd cycle</i>       | 1529               | 14.7 |
| <i>Superior</i>                  | 1384               | 13.3 |
| <b>Marital status</b>            |                    |      |
| <i>Monogamous bride</i>          | 4679               | 44.1 |
| <i>Polygamous Bride</i>          | 1474               | 13.9 |
| <i>Cohabitation</i>              | 2325               | 21.9 |

|                                                 |                    |      |
|-------------------------------------------------|--------------------|------|
| <i>Bachelor</i>                                 | 2132               | 20.1 |
| <b>Number of pregnancies</b>                    |                    |      |
| <i>Nulliparous</i>                              | 3160               | 30.9 |
| <i>Primiparous</i>                              | 2344               | 22.9 |
| <i>Pauciparous</i>                              | 3019               | 29.5 |
| <i>Multiparous</i>                              | 1184               | 11.6 |
| <i>Large multiparous</i>                        | 528                | 5.2  |
| <b>Gestational age (in weeks of amenorrhea)</b> | 24 weeks (16 – 32) |      |
| <i>1st trimester of pregnancy</i>               | 1452               | 14.1 |
| <i>2nd trimester of pregnancy</i>               | 3986               | 38.8 |
| <i>3rd trimester of pregnancy</i>               | 4835               | 47.1 |
| <b>History of abortion</b>                      |                    |      |
| <i>No abortion</i>                              | 8478               | 83.5 |
| <i>01 abortion</i>                              | 1105               | 10.9 |
| <i>02 abortions and more</i>                    | 566                | 5.6  |

161

## 162 **Seroprevalence of HIV infection among pregnant women**

163 Overall, HIV seroprevalence among pregnant women was 2.6%, 95% CI [2.33; 2.93].

164 **Table II:** Seroprevalence of HIV infection among pregnant women

| <b>Seroprevalence of HIV infection among pregnant women</b> |          | <b>N= 10 673</b> |               |
|-------------------------------------------------------------|----------|------------------|---------------|
|                                                             | <b>N</b> | <b>%</b>         | <b>95% CI</b> |
| <b>HIV diagnosis using the national algorithm</b>           |          |                  |               |
| <i>Negative</i>                                             | 10 394   | 97.4             | 97.1 – 97.7   |
| <i>Positive</i>                                             | 279      | 2.6              | 2.33 - 2.93   |

165

## 166 ***Factors associated with HIV seroprevalence among pregnant women***

167 The regions of Adamaoua (aOR (95% CI): (3.78 (1.87-7.67); p<0.001), East (9.38 (5.6-15.67);  
 168 p< 0.001), North 3.07 (1.74-5.42); p<0.001), South (2.93 (1.66-5.16); p<0.001), non-schooling  
 169 in the pregnant women (2 .08 (1.06-4.06); p=0.032), the level of primary education (2.44 (1.32-  
 170 4.50); p=0.004), the level of secondary education (2 .29 (1.28-4.08); p=0.005), nulliparity (2.67  
 171 (1.21-5.87); p=0.015), primiparity (2.72 (1.27-5 .79); p=0.010), pauciparity (2.63 (1.27-5.79);  
 172 p=0.007) and multiparity (2.14 (1.03-4.45); p=0.041) were significantly associated with HIV  
 173 infection. On the other hand, monogamous marriage (0.33 (0.22-0.51); p<0.001), the absence  
 174 of notion of abortion among the pregnant women (0.59 (0.37-0.98); p=0.036) were associated  
 175 with a reduced risk of HIV infection.



176 Regions aOR [CI 95%] Adamaoua 3.78 [1.87-7.67]; p<0.001, East (9.38 [5.6-15.67] ; p<0.001,  
 177 North 3.07 [1.74-5.42]; p<0.001, South 2.93 [1.66-5.16]; p<0.001, non-enrolment among the  
 178 pregnant women 2.08 [1.06-4.06]; p=0.032, primary education level 2.44 [1.32-4.50]; p=0.004  
 179 and secondary education 2.29 [1.28-4.08]; p=0.005 were significantly associated with HIV  
 180 infection. On the other hand, monogamous marriage status 0.33 [0.22-0.51]; p<0.001, the  
 181 absence of any notion of abortion in the pregnant women 0.59 [0.37-0.98]; p=0.036 and large  
 182 multiparous 0.38 [0.17-0.82]; p=0.015 were associated with a reduced risk of HIV infection.

183 **Table III: Determinants of seroprevalence of HIV infection among pregnant women**

|                                      | HIV diagnosis |          | Univariable analysis    |              |                          | Multivariate analysis   |               |                         |
|--------------------------------------|---------------|----------|-------------------------|--------------|--------------------------|-------------------------|---------------|-------------------------|
|                                      | Negative      | Positive | B(SE)                   | P            | OR(95% CI)               | B( SE )                 | P             | aOR (95% CI)            |
| <b>Region</b>                        |               |          |                         |              |                          |                         |               |                         |
| <i>Adamaoua</i>                      | 79.7%         | 2.3%     | 0.471(0.19)             | 0.129        | 1.6(0.87;2.94)           | <b>1.33***(0.36)</b>    | <b>0.001</b>  | <b>3.78(1.87;7.67)</b>  |
| <i>East</i>                          | 91.2%         | 8.8%     | <b>1.89***(0.23)</b>    | <b>0.001</b> | <b>6.59(4.24; 10.27)</b> | <b>2.238***(0.26)</b>   | <b>0.001</b>  | <b>9.38(5.6;15.66)</b>  |
| <i>Far North</i>                     | 97.8%         | 2.2%     | 0.45(0.24)              | 0.063        | 1.57(0.98;2.51)          | <b>1.16***(0.31)</b>    | <b>0.001</b>  | <b>3.2(1.74;5.84)</b>   |
| <i>North</i>                         | 97.6%         | 2.4%     | <b>0.51*(0.24)</b>      | <b>0.033</b> | <b>1.66(1.04;2.66)</b>   | <b>1.121***(0.29)</b>   | <b>0.001</b>  | <b>3.07(1.74;5.42)</b>  |
| <i>West</i>                          | 97.3%         | 2.7%     | 0.64(0.62)              | 0.293        | 1.91(0.57, 6.38)         | 0.834(0.76)             | 0.270         | 2.30(0.52;10.12)        |
| <i>South</i>                         | 96.0%         | 4.0%     | <b>1.03***(0.27)</b>    | <b>0.001</b> | <b>2.81(1.66;4.76)</b>   | <b>1.073***(0.29)</b>   | <b>0.0001</b> | <b>2.93(1.66;5.16)</b>  |
| <i>Yaounde</i>                       | 98.5%         | 1.5%     | 0.18(0.26)              | 0.946        | 1.018(0.61;1.69)         | 0.029(0.27)             | 0.917         | 1.03(0.60, 1.76)        |
| <i>Douala</i>                        | 98.6%         | 1.4%     |                         |              | 1                        |                         |               | 1                       |
| <b>Age</b>                           |               |          |                         |              |                          |                         |               |                         |
| <i>Under 20</i>                      | 97.3%         | 2.7%     | -0.278(0.186)           | 0.246        | 0.76(0.47;1.21)          | <b>-1.192***(0.32)</b>  | <b>0.001</b>  | <b>0.30(0.16;0.57)</b>  |
| <i>20 - 25 years old</i>             | 97.8%         | 2.2%     | <b>-0.485*(0.223)</b>   | <b>0.029</b> | <b>0.615(0.39;0.95)</b>  | <b>-1.083***(0.28)</b>  | <b>0.001</b>  | <b>0.34(0.19, 0.58)</b> |
| <i>25 - 30 years old</i>             | 97.8%         | 2.2%     | <b>-0.481*(0.220)</b>   | <b>0.029</b> | <b>0.618(0.40, 0.95)</b> | <b>-0.822***(0.25)</b>  | <b>0.001</b>  | <b>0.44(0.27;0.71)</b>  |
| <i>30 - 35 years old</i>             | 96.3%         | 3.7%     | 0.06(0.227)             | 0.793        | 1.06(0.68, 1.66)         | -0.058(0.25)            | 0.814         | 0.94(0.58, 1.82)        |
| <i>Over 35 years old</i>             | 96.5%         | 3.5%     |                         |              | 1                        |                         |               | 1                       |
| <b>Level of education</b>            |               |          |                         |              |                          |                         |               |                         |
| <i>Out of school</i>                 | 97.5%         | 2.5%     | <b>0.79** (0.29)</b>    | <b>0.006</b> | <b>2.20(1.25; 3.87)</b>  | <b>0.732*(0.34)</b>     | <b>0.032</b>  | <b>2.08(1.06;4.06)</b>  |
| <i>Primary</i>                       | 96.8%         | 3.2%     | <b>1.02***(0.27)</b>    | <b>0.001</b> | <b>2.78(1.63;4.76)</b>   | <b>0.892*(0.31)</b>     | <b>0.004</b>  | <b>2.44(1.32;4.50)</b>  |
| <i>Lower secondary</i>               | 96.6%         | 3.4%     | <b>1.10(0.27)</b>       | <b>0.001</b> | <b>3.01(1.76;5.15)</b>   | <b>0.828*(0.29)</b>     | <b>0.005</b>  | <b>2.29(1.28;4.08)</b>  |
| <i>Secondary<sup>2nd</sup> cycle</i> | 98.4%         | 1.6%     | 0.31(0.25)              | 0.34         | 1.36(0.72;2.57)          | 0.130(0.34)             | 0.704         | 1.14(0.58;2.22)         |
| <i>Superior</i>                      | 98.8%         | 1.2%     |                         |              | 1                        |                         |               | 1                       |
| <b>Marital status</b>                |               |          |                         |              |                          |                         |               |                         |
| <i>Monogamous bride</i>              | 98.0%         | 2.0%     | <b>-0.489** (0.122)</b> | <b>0.002</b> | <b>0.613(0.45, 0.84)</b> | <b>-1.094*** (0.21)</b> | <b>0.001</b>  | <b>0.33(0.22, 0.51)</b> |
| <i>Polygamous Bride</i>              | 97.4%         | 2.6%     | -0.208(0.203)           | 0.307        | 0.813(0.55, 1.21)        | <b>-0.969*** (0.26)</b> | <b>0.001</b>  | <b>0.38(0.23, 0.64)</b> |
| <i>Cohabitation</i>                  | 96.7%         | 3.3%     | -0.10(0.169)            | 0.951        | 1.01(0.72, 1.41)         | <b>-0.441*(0.19)</b>    | <b>0.021</b>  | <b>0.64(0.44, 0.94)</b> |
| <i>Bachelor</i>                      | 96.8%         | 3.2%     |                         |              | 1                        |                         |               | 1                       |
| <b>Gestational age</b>               |               |          |                         |              |                          |                         |               |                         |
| <i>1st trimester of pregnancy</i>    | 96.8%         | 3.2%     | 0.331(0.178)            | 0.063        | 1.39(0.98, 1.97)         | <b>0.559*(0.19)</b>     | <b>0.004</b>  | <b>1.75(1.19;2.57)</b>  |
| <i>2nd trimester of pregnancy</i>    | 97.1%         | 2.9%     | 0.226(0.135)            | 0.095        | 1.25(0.96; 1.63)         | <b>0.311*(0.15)</b>     | <b>0.034</b>  | <b>1.37(1.02;1.82)</b>  |
| <i>3rd trimester of pregnancy</i>    | 97.7%         | 2.3%     |                         |              | 1                        |                         |               | 1                       |
| <b>Parity</b>                        |               |          |                         |              |                          |                         |               |                         |
| <i>Primiparous</i>                   | 97.7%         | 2.3%     | 0.033(0.322)            | 0.919        | 1.03(0.55, 1.94)         | 0.017(0.20)             | 0.93          | 1.02(0.68;1.52)         |
| <i>Pauciparous</i>                   | 97.1%         | 2.9%     | 0.244(0.312)            | 0.434        | 1.28(0.69;2.35)          | -0.014(0.21)            | 0.95          | 0.99(0.65;1.49)         |
| <i>Multiparous</i>                   | 96.9%         | 3.1%     | 0.327(0.327)            | 0.331        | 1.39(0.12;2.68)          | -0.22(0.27)             | 0.42          | 0.80(0.47; 1.36)        |

|                              |       |      |                       |              |                         |                     |              |                         |
|------------------------------|-------|------|-----------------------|--------------|-------------------------|---------------------|--------------|-------------------------|
| <i>Large multiparous</i>     | 97.7% | 2.3% | 0.33(0.34)            | 0.33         | 1.39(0.72;2.68)         | <b>-0.98*(0.40)</b> | <b>0.015</b> | <b>0.38(0.17;0.82)</b>  |
| <i>Nulliparous</i>           | 97.8% | 2.2% |                       |              | 1                       |                     |              | 1                       |
| <b>History of abortion</b>   |       |      |                       |              |                         |                     |              |                         |
| <i>No abortion</i>           | 97.6% | 2.4% | <b>-0.485*(0.229)</b> | <b>0.034</b> | <b>0.62(0.39, 0.96)</b> | <b>-0.519*(25)</b>  | <b>0.036</b> | <b>0.59(0.37, 0.98)</b> |
| <i>01 abortion</i>           | 97.2% | 2.8% | -0.337(0.28)          | 0.225        | 0.71(0.41, 1.25)        | -0.259(0.29)        | 0.379        | 0.77(0.43, 1.37)        |
| <i>02 abortions and more</i> | 96.1% | 3.9% |                       |              | 1                       |                     |              | 1                       |

184 **1**: reference category; **B(ES)**: regression coefficient (standard error); **P**: significance; \*: significant at 5%; \*\*: significant at 1%; **aOR**: adjusted  
 185 Odds Ratio

## 186 Discussion

187 Evidence on HIV infection and its predictors among pregnant women is key to ensuring an  
 188 HIV free new generation of children beyond 2030. Most importantly, LMICs like Cameroon  
 189 require such epidemiological surveillance to set-up priority interventions with impact at  
 190 country-level. In the present study, HIV seroprevalence among pregnant women was 2.6%  
 191 IC95% [2.33; 2.93]. These results are similar to the last national HIV prevalence rate (2.7%)  
 192 conducted in 2018 (11). Similarly, our findings are in close alignment with those of previous  
 193 studies conducted in Burkina Faso (2.16%) and Mali (2.85%) (16,17). The present prevalence  
 194 is significantly lower compared to the 2016 and 2019 sentinel surveys with 5.75% and 4.26%  
 195 respectively among pregnant women (12,13), including the results of studies which reported  
 196 HIV prevalences of 5.70% (95% CI: 4.93-6.40), 6% (3.0-10.2%) and 7.8% respectively among  
 197 pregnant women in Cameroon (18–20). Furthermore, the respective prevalence rates of 9.2%  
 198 and 7.22% reported in the countries of Chad and Nigeria are also of relevance (21,22). Our  
 199 findings therefore reflect the declining trend of HIV among pregnant women in Cameroon  
 200 (7.6% in 2009 to 2.9% in 2016 (19,23) and from 3.4% in 2018 to 2.1% in 2022 (24–26). This  
 201 declining prevalence is the result of progress and strategies implemented by Cameroon in  
 202 recent years to strengthen HIV prevention among women, who are disproportionately affected  
 203 by HIV. These include the integration of reproductive health and maternal, newborn, child and  
 204 adolescent health services/HIV/PMTCT, decentralisation of services and delegation of tasks,  
 205 family-based HIV testing, implementation of option B+, contact tracing, implementation of  
 206 Users Fees and HIV self-testing for partners of pregnant women (24).

207 The spatial distribution of HIV among pregnant women shows regional disparities varying  
208 from 2.2% in the Far North to 8.8% in the East and similarly low prevalence in the country  
209 major cities of Yaoundé (1.5%) and Douala (1.4%) (11). In similar surveys, regional variations  
210 from 0.7% in the Far North to 11.8% in the South, as well varying trends between urban and  
211 rural settings (14,19). These regional and urban disparities show that prevention activities and  
212 priority interventions achieved the expected goals more easily in the major cities, likely due to  
213 accessibility to several channels and means of information and communication. In addition, the  
214 educational level and the presence of community-based organisations in these major cities also  
215 contribute to strengthening HIV prevention, raising awareness and involving pregnant women  
216 and their partners in healthy behavioural factors. Henceforth, these results suggest  
217 strengthening strategies through targeted and differentiated priority HIV prevention  
218 interventions in regions, also supported by previous the Demographic and Health Survey (11).

219 Regarding drivers of HIV infection, single pregnant women were more likely to be infected  
220 with HIV than married or cohabiting women. These results are similar to previous reports  
221 (14,27), likely due to the fact that unmarried women are more likely to have several sexual  
222 partners thus increasing the risk of infection. Also, their economic vulnerability of most single  
223 women also exposes them to transactional sex (28). In this study, the risk of HIV infection  
224 increased with age. Indeed, pregnant women aged 30 and over were more likely to be infected  
225 with HIV than younger women. These results are comparable to those reported in the study by  
226 Anoubissi and al (14). These results are consistent with the distribution of HIV infection in the  
227 general population and suggest that younger women are better at implementing HIV prevention  
228 measures than older women. Lower level of education was significantly associated with a two-  
229 folds risk of acquiring HIV infection, as previously reported similarly reported in Cameroon  
230 and elsewhere (18,29). Thus, HIV prevention should prioritise women with low educational  
231 level, as they appear to poorly assimilate and implement HIV preventive measures. Gestational  
232 age, parity and history of abortion were significantly associated with HIV infection. Indeed,

233 pregnant women in their 1<sup>st</sup> or 2<sup>nd</sup> trimester were almost 2 times more likely to be infected with  
234 HIV than those in their 3<sup>rd</sup> trimester. Similarly, nulliparous, primiparous, pauciparous or  
235 multiparous pregnant women were almost 2 times more likely to be infected with HIV than  
236 large multiparous women. While suggesting further investigation on this area, Rindcy Davis *et*  
237 *al* showed that primiparous women were associated with a slightly lower prevalence of HIV  
238 testing (aPR 0.97, 95% CI 0.95, 0.99) than nulliparous women (30). Furthermore, pregnant  
239 women who had no abortions were 41% less likely to be infected with HIV than those who had  
240 had two or more abortions. Abortions generally traumatise and cause cervical and vaginal  
241 lesions, which probably increase the risk of contracting STIs, including HIV.

242 The potential limitations of this study would be the inability to detect cases of early infection,  
243 which would have been handled by performing nucleic acid testing or p24 antigen detection.  
244 However, this might have limited inference on the present evidence.

## 245 **Conclusion**

246 Despite the overall low-prevalence among pregnant women at national-level (2.6%), there are  
247 target population still experiencing higher risk of infection within the frame of an ongoing  
248 pregnancy, which include the absence or low-level of education, being elderly (>30 years),  
249 singleness, history of abortion and reporting low parity during ANC. Thus, public-health  
250 interventions towards these at-risk target groups will further limit events of new HIV infections  
251 among pregnant women, hence contributing to achieve eMTCT in Cameroon and other LMICs  
252 sharing similar epidemiological and programmatic features.

## 253 **Acknowledgments**

254 We would like to thank all the participants in the study for their contributions. We would also  
255 like to express our gratitude to Dr. Bacha Abdelkader for his collaboration and commitment in  
256 the implementation of the study. We would also like to thank the Cameroon Ministry of Public  
257 Health, UNICEF Cameroon and the Health Project Implementation Unit of the Islamic  
258 Development Bank for providing the necessary and accurate resources.

## 259 **References**

- 260 1. Wijesooriya NS, Rochat RW, Kamb ML, Turlapati P, Temmerman M, Broutet N, et al.  
261 Global burden of maternal and congenital syphilis in 2008 and 2012: a health system  
262 modelling study. *Lancet Glob Health*. 2016 Aug;4(8):e525–33.
- 263 2. UNAIDS. Global AIDS Update [Internet]. 2016. Available from:  
264 <http://www.unaids.org/en/resources/documents/2016/Global-AIDS-update-2016>
- 265 3. UNAIDS. Global AIDS Progress Report. 2017.
- 266 4. WHO. Strategic framework for the elimination of new HIV infections among children in  
267 Africa by 2015. Africa Regional Office. Brazzaville; 2013.
- 268 5. Ministry of Health (MINSANTE), Division of Operational Research in Health (DROS).  
269 Assessment of the impact of HIV on the population in Cameroon (CAMPHIA) 2017-2018:  
270 Final report. Yaoundé: MINSANTE-DROS; 2020.
- 271 6. De Cock KM, Fowler MG, Mercier E, De Vincenzi I, Saba J, Hoff E, et al. Prevention of  
272 Mother-to-Child HIV Transmission in Resource-Poor Countries: Translating Research Into  
273 Policy and Practice. *JAMA*. 2000 Mar 1;283(9):1175.
- 274 7. WHO. Antiretroviral drugs for treating pregnant women and preventing HIV infection in  
275 infants. Recommendations for a public health approach. WHO Press; 2010.
- 276 8. Ciaranello AL, Perez F, Keatinge J, Park JE, Engelsmann B, Maruva M, et al. What Will It  
277 Take to Eliminate Pediatric HIV? Reaching WHO Target Rates of Mother-to-Child HIV  
278 Transmission in Zimbabwe: A Model-Based Analysis. Binagwaho A, editor. *PLoS Med*.  
279 2012 Jan 10;9(1):e1001156.

- 280 9. Takah NF, Kennedy ITR, Johnman C. The impact of approaches in improving male partner  
281 involvement in the prevention of mother-to-child transmission of HIV on the uptake of  
282 maternal antiretroviral therapy among HIV-seropositive pregnant women in sub-Saharan  
283 Africa: a systematic review and meta-analysis. *BMJ Open*. 2017 Nov;7(11):e018207.
- 284 10. National Institute of Statistics (INS), ICF International. Cameroon Demographic and  
285 Health Survey and Multiple Indicators 2011. Yaoundé, Cameroon: Carverton, Maryland,  
286 USA: INS and ICF International; 2011.
- 287 11. INS, MoH and ICF. Cameroon Demographic and Health Survey 2018. Yaounde,  
288 Cameroon and Rockville, Maryland, USA; 2020.
- 289 12. NACC. 2019 annual report on activities to combat HIV, AIDS and STIs [Internet].  
290 Yaounde; 2019. Available from:  
291 [https://drive.google.com/file/d/1bhrNghpxvaFnU5cLucY\\_0wk9zZZllohZ/view](https://drive.google.com/file/d/1bhrNghpxvaFnU5cLucY_0wk9zZZllohZ/view)
- 292 13. NACC. Sentinel surveillance of HIV and Syphilis among pregnant women attending  
293 prenatal consultations in Cameroon in 2016. Yaounde: NACC; 2017.
- 294 14. Anoubissi JDD, Gabriel EL, Kengne Nde C, Fokam J, Tseuko DG, Messeh A, et al. Factors  
295 associated with risk of HIV-infection among pregnant women in Cameroon: Evidence from  
296 the 2016 national sentinel surveillance survey of HIV and syphilis. Ciccozzi M, editor.  
297 *PLOS ONE*. 2019 Apr 12;14(4):e0208963.
- 298 15. Lemeshow S. Adequacy of sample size in health studies. No Title. 1990;
- 299 16. Ky A, Ba I, Diallo I, Diendéré A, Toguyeni L, Tamini S, et al. HIV infection among  
300 pregnant women seen in prenatal consultations in three (3) health centers in Bobo-  
301 Dioulasso and associated risk factors.

- 302 17. Telly N, Ballo T, Sangho O, Kayentao K, Traore S, Traore B, et al. Factors associated with  
303 HIV infection and/or syphilis in the sentinel surveillance study among pregnant women in  
304 antenatal clinics in Mali. *Rev Malienne Sci Technol.* 2020;1(24).
- 305 18. Billong SC, Fokam J, Billong EJ, Nguefack-Tsague G, Essi MJ, Fodjo R, et al.  
306 Epidemiological distribution of HIV infection among pregnant women in the ten regions of  
307 Cameroon and strategic implications for prevention programs. *Pan Afr Med J.* 2015;20:79–  
308 79.
- 309 19. Dionne-Odom J, Mbah R, Rembert NJ, Tancho S, Halle-Ekane GE, Enah C, et al. Hepatitis  
310 B, HIV, and Syphilis Seroprevalence in Pregnant Women and Blood Donors in Cameroon.  
311 *Infect Dis Obstet Gynecol.* 2016;2016:1–8.
- 312 20. Billong SC, Fokam J, Anoubissi JDD, Kengne Nde C, Toukam Fodjo R, Ngo Nemb M, et  
313 al. The declining trend of HIV-Infection among pregnant women in Cameroon infers an  
314 epidemic decline in the general population. *Heliyon.* 2020 Jun;6(6):e04118.
- 315 21. Hota M, Yandai F, Moussa A, Moustapha A, Mbanga D, Otchom B. Prevalence and  
316 transmission of human immunodeficiency virus from mother to child in N'Djamena. *Int J*  
317 *Biol Chem Sci.* 2019;13(4):2192–9.
- 318 22. Ozim CO, Mahendran R, Amalan M, Puthussery S. Prevalence of human  
319 immunodeficiency virus (HIV) among pregnant women in Nigeria: a systematic review and  
320 meta-analysis. *BMJ Open.* 2023;13(3):e050164.
- 321 23. Kengne-Nde C, De Dieu Anoubissi J, Loni-Ekali G, Nguefeu-Nkenfou C, Moussa Y,  
322 Messeh A, et al. Highlighting a population-based re-emergence of Syphilis infection and  
323 assessing associated risk factors among pregnant women in Cameroon: Evidence from the  
324 2009, 2012 and 2017 national sentinel surveillance surveys of HIV and syphilis. Peters RP,  
325 editor. *PLOS ONE.* 2020 Nov 13;15(11):e0241999.

- 326 24. NACC. NACC Annual Report 2020. Yaoundé-Cameroon: MoH-NACC; 2021.
- 327 25. NACC. NACC Annual Report 2021. Yaoundé-Cameroon: MoH-NACC; 2022.
- 328 26. NACC. 2022 annual report of HIV activities. Yaoundé-Cameroon: MoH-NACC; 2023.
- 329 27. Mabaso M, Sokhela Z, Mohlabane N, Chibi B, Zuma K, Simbayi L. Determinants of HIV  
330 infection among adolescent girls and young women aged 15–24 years in South Africa: a  
331 2012 population-based national household survey. *BMC Public Health*. 2018  
332 Dec;18(1):183.
- 333 28. Dellar RC, Dlamini S, Karim QA. Adolescent girls and young women: key populations for  
334 HIV epidemic control. *J Int AIDS Soc*. 2015;18:19408.
- 335 29. Schumann H, Rubagumya K, Rubaihayo J, Harms G, Wanyenze RK, Theuring S. The  
336 incidence of HIV and associated risk factors among pregnant women in Kabarole District,  
337 Uganda. *PLoS One*. 2020;15(6):e0234174.
- 338 30. Davis R, Xiong X, Alhabe F, Lefante J, Cafferata ML, Mwenechanya M, et al. Factors  
339 associated with HIV and syphilis screenings among pregnant women at first antenatal visit  
340 in Lusaka, Zambia. *BMC Res Notes*. 2020;13:1–7.
